# Supplementary material for: Unlocking superior lithium storage via synergistic confinement: metal–organic framework-derived carbon-confined metal sulfides
Source: Royal Society of Chemistry journal article supplement (doi:10.1039/d5ce01117e), 2026-01-01
Supplement: d5ce01117e1.pdf [file d5ce01117e1.pdf]

## Supporting Information

### Unlocking Superior Lithium Storage via Synergistic Confinement: Metal-Organic Frameworks Derived Carbon- Confined Metal Sulfides

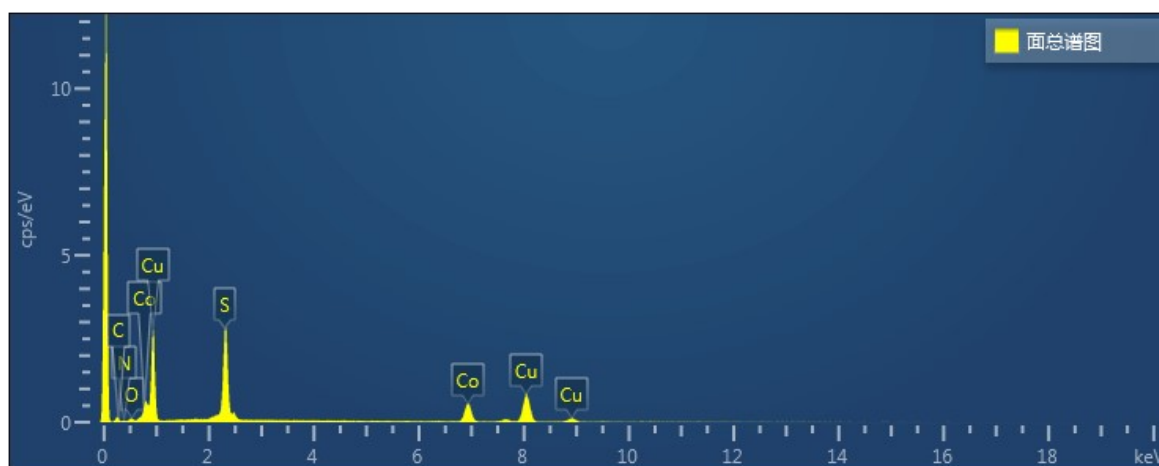

Figure S1 EDS spectrum of Cu<sub>9</sub>S<sub>5</sub>/NC@Co<sub>3</sub>S<sub>4</sub>/NC.

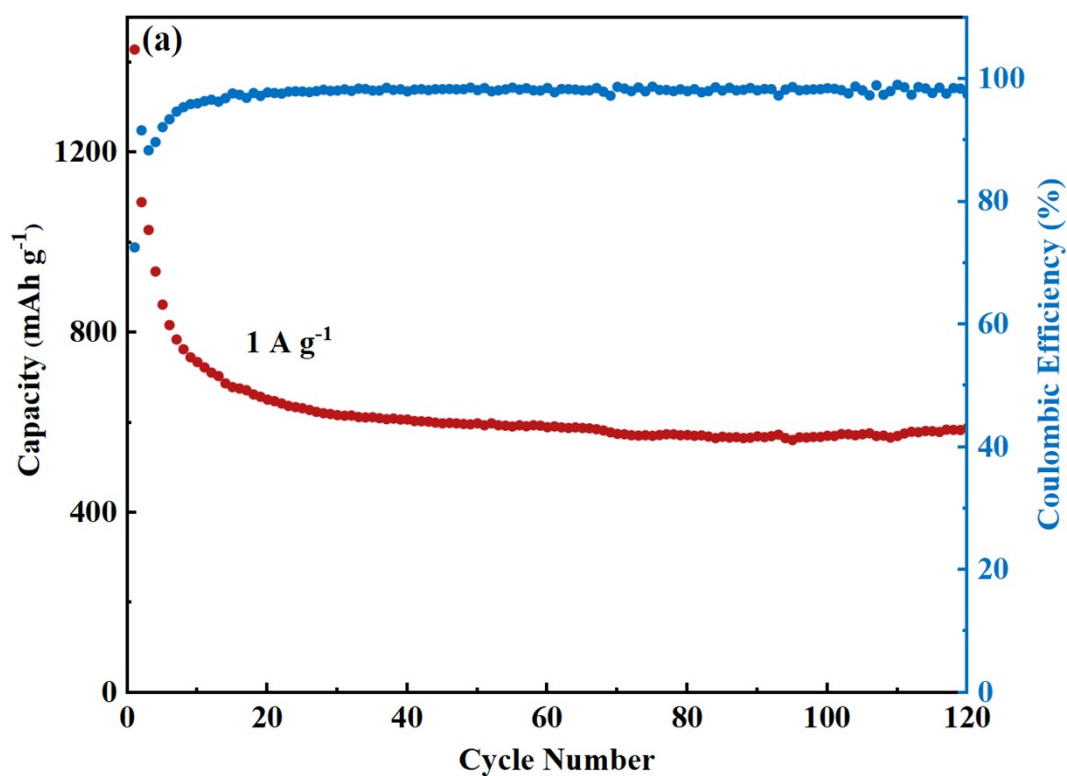

Figure S2 Cycling performance of Cu<sub>9</sub>S<sub>5</sub>/NC@Co<sub>3</sub>S<sub>4</sub>/NC anodes at 1 A g<sup>-1</sup>.

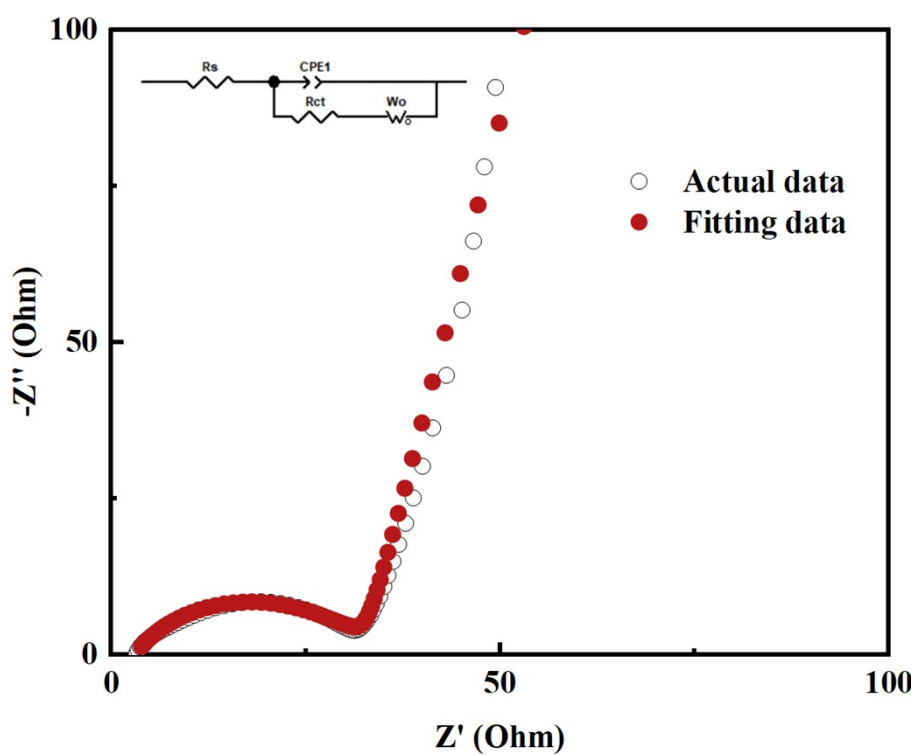

**Figure S3** EIS of the  $\text{Cu}_9\text{S}_5/\text{NC}@\text{Co}_3\text{S}_4/\text{NC}$  anode before and after fitting.

**Table S1** Comparison of the capacity of this work with previously reported anodes.

| Samples                                                  | Current density        | Cycle number | Capacity ( $\text{mAh g}^{-1}$ ) | Ref. |
|----------------------------------------------------------|------------------------|--------------|----------------------------------|------|
|                                                          | ( $\text{mA g}^{-1}$ ) |              |                                  |      |
| $\text{ZnS}/\text{Co}_3\text{S}_4$                       | 1000                   | 200          | 750                              | [1]  |
| $\text{Cu}_9\text{S}_5/\text{CNFs}$                      | 100                    | 100          | 709.2                            | [2]  |
| $\text{CNTs}@\text{NC}@\text{Co}_3\text{S}_4$            | 5000                   | 500          | 311                              | [3]  |
| $\text{Ni}_3\text{S}_4/\text{Co}_3\text{S}_4@\text{NSC}$ | 100                    | 100          | 825.4                            | [4]  |
| $\text{Ni}_3\text{S}_2/\text{CNWs}$                      | 200                    | 200          | 906                              | [5]  |
| $\text{PW}_{12}@\text{Co}_3\text{S}_4@\text{GO}$         | 100                    | 200          | 1036.4                           | [6]  |
| $\text{Cu}_9\text{S}_5\text{-MoS}_x$                     | 2000                   | 3600         | 376                              | [7]  |

|                                                                   |          |         |              |           |
|-------------------------------------------------------------------|----------|---------|--------------|-----------|
| $\text{Fe}_3\text{S}_4/\text{Co}_9\text{S}_8$                     | 100      | 100     | 945          | [8]       |
| $\text{CNT/PAN}@\text{Co}_9\text{S}_8@\text{C}$                   | 2000     | 100     | 455          | [9]       |
| $\text{Cu}_4\text{SnS}_4/\text{CuS}@\text{C}$                     | 100      | 60      | 881.9        | [10]      |
| $\text{Cu}_9\text{S}_5/\text{NC}@\text{Co}_3\text{S}_4/\text{NC}$ | 100/5000 | 120/700 | 1067.3/444.8 | this work |

**Table S2** Impedance fitting results

| Sample                                                            | $R_s (\Omega)$ | $R_{ct} (\Omega)$ | $R_{total} (\Omega)$ |
|-------------------------------------------------------------------|----------------|-------------------|----------------------|
| $\text{Cu}_9\text{S}_5/\text{NC}@\text{Co}_3\text{S}_4/\text{NC}$ | 3.9            | 28.2              | 32.1                 |

## Reference

- [1] Zheng Zhang, Ying Huang, Xudong Liu, et al. Zeolitic imidazolate frameworks derived  $\text{ZnS}/\text{Co}_3\text{S}_4$  composite nanoparticles doping on polyhedral carbon framework for efficient lithium/sodium storage anode materials. *Carbon*, 2020, 157, 244-254.
- [2] Rou Lu, Shuang Zhou, Simin Chai, et al.  $\text{Cu}_9\text{S}_5$  nanoparticles encapsulated in N, S co-doped carbon nanofibers as anodes for high-performance lithium-ion and sodium-ion batteries. *Journal of Physics D-Applied Physics*, 2022, 55, 334001.
- [3] Guangming Wang, Hailong Yue, Rencheng Jin, et al.  $\text{Co}_3\text{S}_4$  ultrathin nanosheets entangled on N-doped amorphous carbon coated carbon nanotubes with C-S bonding for high performance Li-ion batteries. *Journal of Electroanalytical Chemistry*, 2020, 858, 113794.
- [4] Kairui Xu, Yongqiang Ren, Bei Zhang. et al. Engineering of  $\text{Ni}_3\text{S}_4/\text{Co}_3\text{S}_4$  nanosheets@N, S co-doped carbon anode for lithium-ion batteries. *Ionics*, 2021, 27, 5089-5096.
- [5] Haijun Chen, Yan Wang, Xudong Ma, et al. Cation-adsorption-assisted  $\text{Ni}_3\text{S}_2/\text{Carbon}$  nanowalls composites with three-dimensional interconnected porous structures for high-

performance lithium-ion battery anodes. *Journal of Materials Science*, 2020, 55, 17081-17093.

- [6] Lingling Liu, Tong Wang, Junkai Zhao, et al. Insight into lithiation mechanism of  $\text{Co}_3\text{S}_4$  anode for lithium-ion batteries triggered by keggins POMs and GO. *Chemical Engineering Journal*, 2025, 506, 159999.
- [7] Xiaoming Yu, Hongxin Yu, Linwei Yin, et al. Tubular-like nanocomposites with embedded  $\text{Cu}_9\text{S}_5$ - $\text{MoS}_x$  crystalline-amorphous heterostructure in N-doped carbon as Li-ion batteries anode toward ultralong cycling stability. *ACS Applied Materials & Interfaces*, 2024, 34(16), 44678-44688.
- [8] Qiang Liu, Zizhong Chen, Rong Qin, et al. Hierarchical mulberry-like  $\text{Fe}_3\text{S}_4/\text{Co}_9\text{S}_8$  nanoparticles as highly reversible anode for lithium-ion batteries. *Electrochimica Acta*, 2019, 304, 405-414.
- [9] Juntong Gao, Xingchao Wang, Yudai Huang, et al. Hollow core-shell structured  $\text{CNT/PAN@Co}_9\text{S}_8\text{@C}$  coaxial nanocables as high-performance anode material for lithium ion batteries. *Journal of Alloys and Compounds*, 2021, 853, 157354.
- [10] Shurong Xu, Shoujing Mao, Wenxin Liu, et al. Construction of  $\text{Cu}_4\text{SnS}_4/\text{CuS@C}$  nanorods with high initial coulombic efficiency for lithium-ion batteries. *Journal of Energy Storage*, 2025, 115, 115885.
